# Supplementary material for: Urinary Proteomics and Outcomes in Heart Failure With Preserved Ejection Fraction
Source: PubMed Central journal article supplement — J Am Heart Assoc. 2024 Apr 19;13(9):e033410. doi: 10.1161/JAHA.123.033410 (PMC11179922; doi:10.1161/jaha.123.033410), 2024-04-19
Supplement: JAH3-13-e033410-s001.pdf [file JAH3-13-e033410-s001.pdf]

# **SUPPLEMENTAL MATERIAL**

**Table S1. Name, function, and category of urinary proteins associated with DHFA in our study in either non-adjusted or adjusted analyses.**

| Short name       | Full name                                           | Function                                                                                                                                                                            | Biologic process                                                                                                                                                    |
|------------------|-----------------------------------------------------|-------------------------------------------------------------------------------------------------------------------------------------------------------------------------------------|---------------------------------------------------------------------------------------------------------------------------------------------------------------------|
| <b>Albumin</b>   | Albumin                                             | Binds water, electrolytes, hormones, drugs. Regulates colloid osmotic pressure in blood.                                                                                            | Transporter, osmotic regulator                                                                                                                                      |
| <b>ALDH1A1</b>   | Aldehyde dehydrogenase 1A1                          | Cytosolic dehydrogenase that catalyzes oxidation of a wide range of aldehydes to carboxylic acids                                                                                   | Lipid metabolism                                                                                                                                                    |
| <b>AMY2A</b>     | Pancreatic alpha-amylase                            | Hydrolyzes 1,4-alpha-D-glucosidic bonds in oligosaccharides and polysaccharides                                                                                                     | Carbohydrate metabolism                                                                                                                                             |
| <b>AMY2B</b>     | Pancreatic alpha-amylase 2B                         | Hydrolyzes 1,4-alpha--D-glucosidic bonds in oligosaccharides and polysaccharides                                                                                                    | Carbohydrate metabolism                                                                                                                                             |
| <b>ANGPTL2</b>   | Angiopoietin-related protein 2                      | A member of the vascular endothelial growth factor family, promotes inflammation, potentially pleiotropic functions                                                                 | Multicellular organism development                                                                                                                                  |
| <b>APCS</b>      | Serum amyloid P-component                           | Can interact with DNA and histones                                                                                                                                                  | Many (innate immune response, complement activation, chaperone-mediated protein complex assembly, negative regulation of monocyte differentiation, protein folding) |
| <b>ATP1B1</b>    | Sodium/potassium-transporting ATPase subunit beta-1 | Na <sup>+</sup> /K <sup>+</sup> ATPase is an important membrane protein responsible for the electrochemical gradients of sodium and potassium ions.                                 | Cell adhesion, immunity, innate immunity, ion transport, potassium transport                                                                                        |
| <b>ATP5F1A</b>   | ATP synthase subunit alpha, mitochondrial           | A subunit of mitochondrial ATP synthase.                                                                                                                                            | ATP synthesis, hydrogen ion transport, ion transport, transport                                                                                                     |
| <b>Attractin</b> | Attractin                                           | Involved in the initial immune inflammatory response and may regulate chemokines. May play a role in melanocortin signaling pathways involved in energy homeostasis and hair color. | Inflammatory response                                                                                                                                               |

|                    |                                          |                                                                                                                                                                                        |                                                                                                                |
|--------------------|------------------------------------------|----------------------------------------------------------------------------------------------------------------------------------------------------------------------------------------|----------------------------------------------------------------------------------------------------------------|
| <b>B4GALT1</b>     | Beta-1,4-galactosyltransferase 1         | Membrane-bound glycoproteins that transfer galactose to acceptor sugars.                                                                                                               | lipid metabolism                                                                                               |
| <b>C11orf54</b>    | Ester hydrolase<br>C11orf54              | Enables hydrolase activity. unknown biological role                                                                                                                                    | Hydrolase                                                                                                      |
| <b>COL15A1</b>     | Collagen alpha-1(XV) chain               | Collagen type XV is predominantly located in the basement membrane zones of microvessels and cardiac or skeletal myocytes                                                              | Fibrosis                                                                                                       |
| <b>COL6A1</b>      | Collagen alpha-1(VI) chain               | Collagen VI is a major structural component of microfibrils                                                                                                                            | Fibrosis                                                                                                       |
| <b>CPE</b>         | Carboxypeptidase E                       | Involved in synthesis of neuropeptides and peptide hormones. Catalyzes the release of C-terminal arginine or lysine residues.                                                          | Many (cardiac LV morphogenesis, insulin processing, neuropeptide signaling pathway, peptide hormone secretion) |
| <b>DNASE1</b>      | Deoxyribonuclease-1                      | Serum endonuclease. Involved in cell death by apoptosis                                                                                                                                | Apoptosis                                                                                                      |
| <b>EGF</b>         | Pro-epidermal growth factor              | EGF stimulates the growth of various epidermal and epithelial tissues                                                                                                                  | Many (negative regulation of cholesterol efflux, endothelial cell migration, angiogenesis)                     |
| <b>Haptoglobin</b> | Haptoglobin                              | Haptoglobin binds free hemoglobin. It also has antibacterial activity and plays a role in many aspects of the acute phase reactions.                                                   | Acute phase response, immunity                                                                                 |
| <b>HMCN1</b>       | Hemicentin-1                             | Involved in cytoskeleton development, basement membrane organization, and cell division.                                                                                               | Cell cycle, cell division, sensory transduction, vision                                                        |
| <b>HSPD1</b>       | 60 kDa heat shock protein, mitochondrial | Chaperonin associated with mitochondrial protein import. May also prevent misfolding and promote proper assembly of polypeptides generated under stress conditions in the mitochondria | Host-virus interaction                                                                                         |
| <b>ICOSLG</b>      | ICOS ligand                              | Ligand for T-cell specific receptor ICOS                                                                                                                                               | Inflammatory response                                                                                          |

|                 |                                                                        |                                                                                                            |                                                                                                                                          |
|-----------------|------------------------------------------------------------------------|------------------------------------------------------------------------------------------------------------|------------------------------------------------------------------------------------------------------------------------------------------|
| <b>IGFALS</b>   | Insulin-like growth factor-binding protein complex acid labile subunit | Growth promoting peptides. Increases the half-life of insulin like growth factors.                         | Cell adhesion                                                                                                                            |
| <b>IGHA2</b>    | Immunoglobulin heavy constant alpha 2 (IGHA2)                          | Constant region of immunoglobulin heavy chains.                                                            | Immune response                                                                                                                          |
| <b>IGLV3-25</b> | Immunoglobulin lambda variable 3-25                                    | Region of the immunoglobulin light chains that participates in antigen recognition                         | Adaptive immunity, immunity                                                                                                              |
| <b>KIF3A</b>    | Kinesin-like protein                                                   | Microtubule-based anterograde translocator for membranous organelles, cilia formation, centriole cohesion. | Microtubule-based movement                                                                                                               |
| <b>LRRC19</b>   | Leucine-rich repeat-containing protein 19                              | Involved in signaling pathways, inflammation.                                                              | Host mediated regulation of intestinal microbiota composition, regulation of inflammatory response, toll-like receptor signaling pathway |
| <b>MAGEA4</b>   | Melanoma-associated antigen 4                                          | Regulates cell proliferation                                                                               | Negative regulation of apoptotic process, negative regulation of transcription by RNA polymerase II, positive regulation of cell cycle   |
| <b>MAN1A1</b>   | Mannosyl-oligosaccharide 1,2-alpha-mannosidase IA                      | Involved in the synthesis of glycoproteins                                                                 | Carbohydrate metabolism, golgi apparatus mannose trimming, protein targeting to ER, ubiquitin-dependent ERAD pathway                     |
| <b>MBD1</b>     | Methyl-CpG-binding domain protein 1                                    | Transcriptomal repressor                                                                                   | Cell replication, DNA transcription                                                                                                      |
| <b>MELTF</b>    | Melanotransferrin                                                      | Involved in cellular iron uptake. Present on melanoma cells                                                | iron transport, coagulation, inflammation                                                                                                |
| <b>PGKA</b>     | Phosphoglycerate kinase 1                                              | Catalyzes one of the two ATP producing reactions in the glycolytic pathway                                 | Glycolysis                                                                                                                               |
| <b>PLAU</b>     | Urokinase-type plasminogen activator                                   | Cleaves the zymogen plasminogen to form the active enzyme plasmin.                                         | Blood coagulation, fibrinolysis, hemostasis, plasminogen activation                                                                      |

|                  |                                                                   |                                                                                                                                                           |                                                                                |
|------------------|-------------------------------------------------------------------|-----------------------------------------------------------------------------------------------------------------------------------------------------------|--------------------------------------------------------------------------------|
| <b>Prostasin</b> | Prostasin                                                         | Trypsinogen, a serine protease.                                                                                                                           | Hydrolase, protease, serine protease                                           |
| <b>PROZ</b>      | Vitamin K-dependent protein Z                                     | Involved in hemostasis. Inhibits coagulation factor Xa.                                                                                                   | Blood coagulation, hemostasis                                                  |
| <b>QPCT</b>      | Glutaminyl-peptide cyclotransferase                               | Catalyzes formation of N-terminal pyroglutamates in peptides and proteins.                                                                                | Cellular protein modification process                                          |
| <b>SERPINA5</b>  | Plasma serine protease inhibitor                                  | Inactivates serine proteases.                                                                                                                             | Fertilization, lipid transport, transport                                      |
| <b>SLC12A3</b>   | Solute carrier family 12 member 3                                 | Sodium and chloride ion cotransporter. Receptor for the cytokine IL18                                                                                     | Ion transport, sodium transport, symport, transport, potassium ion homeostasis |
| <b>SLC2A5</b>    | Solute carrier family 2, facilitated glucose transporter member 5 | Fructose transporter. Plays a role in the regulation of salt uptake.                                                                                      | transport, sugar transport                                                     |
| <b>X6R868</b>    | Bile salt activated lipase                                        | Bile salt activated lipase                                                                                                                                | Digestion                                                                      |
| <b>XPNPEP2</b>   | Xaa-Pro aminopeptidase 2                                          | Metalloprotease which catalyzes the removal of a residue from the N-termini of peptides. May play a role in the metabolism of the vasodilator bradykinin. | Protease                                                                       |
| <b>ZG16B</b>     | Zymogen granule protein 16 homolog B                              | Carbohydrate binding activity, retina homeostasis                                                                                                         | Carbohydrate binding, retina homeostasis                                       |

**Name, function, and category of proteins, as adapted from Uniprot (1) and Genecards (2).**

**Table S2. Urinary biomarkers associated with DHFA when adjusting for urine creatinine and eGFR.** Urinary proteins significantly associated with the outcome when adjusting for total urine proteins include 23 significant proteins, all of which were present in our primary analyses.

| UNIPROT ID | Short Name | Full name                                                         | Hazard Ratio | 95% CI    | P value |
|------------|------------|-------------------------------------------------------------------|--------------|-----------|---------|
| Q9UKU9     | ANGPTL2    | Angiopoietin-related protein 2                                    | 0.61         | 0.49-0.74 | 0.0006  |
| P04746     | AMY2A      | Pancreatic alpha-amylase                                          | 0.57         | 0.45-0.71 | 0.0004  |
| P24855     | DNASE1     | Deoxyribonuclease-1                                               | 0.56         | 0.45-0.7  | 0.0002  |
| P00352     | ALDH1A1    | Aldehyde dehydrogenase 1A1                                        | 0.59         | 0.47-0.73 | 0.0004  |
| P19961     | AMY2B      | Pancreatic alpha amylase 2B                                       | 0.58         | 0.45-0.73 | 0.0022  |
| P00749     | PLAU       | Urokinase-type plasminogen activator                              | 0.61         | 0.48-0.76 | 0.0062  |
| P10809     | HSP60      | 60 kDa heat shock protein, mitochondrial                          | 0.60         | 0.49-0.74 | 0.0005  |
| A0A0C4DGN4 | ZG16B      | Zymogen granule protein 16 homolog B                              | 0.62         | 0.5-0.76  | 0.0023  |
| K4DIA0     | ICOSLG     | ICOS ligand                                                       | 0.64         | 0.51-0.79 | 0.0097  |
| P00558     | PGKA       | Phosphoglycerate kinase 1                                         | 0.66         | 0.54-0.8  | 0.0067  |
| P01133     | EGF        | Pro-epidermal growth factor                                       | 0.60         | 0.47-0.75 | 0.0032  |
| Q9H0W9     | C11orf54   | Ester hydrolase C11orf54                                          | 0.64         | 0.51-0.8  | 0.0356  |
| K7EPZ6     | MBD1       | Methyl-CpG-binding domain protein 1                               | 1.62         | 1.29-2.02 | 0.0064  |
| P22732     | SLC2A5     | Solute carrier family 2, facilitated glucose transporter member 5 | 0.64         | 0.51-0.78 | 0.0055  |
| P25705     | ATP5F1A    | ATP synthase subunit alpha, mitochondrial                         | 0.64         | 0.52-0.78 | 0.0056  |
| P05026     | ATP1B1     | Sodium/potassium-transporting ATPase subunit beta-1               | 0.64         | 0.51-0.79 | 0.0149  |
| P15291     | B4GALT1    | Beta-1,4-galactosyltransferase 1                                  | 0.62         | 0.49-0.77 | 0.0094  |
| P02743     | APCS       | Serum amyloid P-component                                         | 1.50         | 1.23-1.81 | 0.0145  |
| A0A087X0K0 | COL15A1    | Collagen alpha-1(XV) chain                                        | 0.65         | 0.52-0.79 | 0.0124  |
| Q16769     | QPCT       | Glutaminy-peptide cyclotransferase                                | 0.66         | 0.53-0.81 | 0.0344  |
| P01717     | IGLV3-25   | Immunoglobulin lambda variable 3-25                               | 1.53         | 1.24-1.88 | 0.0186  |
| P43358     | MAGEA4     | Melanoma-associated antigen 4                                     | 1.51         | 1.24-1.84 | 0.0117  |
| P06576     | ATPB       | ATP Synthase subunit beta                                         | 0.64         | 0.51-0.79 | 0.0136  |

HR = Hazard Ratio, CI = confidence interval, eGFR = estimated glomerular filtration rate

**Table S3. Urinary biomarkers associated with DHFA adjusting for total urine protein.**

Urinary proteins significantly associated with the outcome when adjusting for total urine proteins include 18 significant proteins, all of which were present in our main analyses.

| <b>Uniprot ID</b> | <b>Short name</b> | <b>Full name</b>                                                       | <b>HR</b> | <b>95%CI</b> | <b>P value</b> |
|-------------------|-------------------|------------------------------------------------------------------------|-----------|--------------|----------------|
| P02743            | APCS              | Serum amyloid P-component                                              | 1.63      | 1.34-2.00    | 0.0003         |
| P01717            | IGLV3-25          | Immunoglobulin lambda variable 3-25                                    | 1.53      | 1.24-1.88    | 0.0176         |
| Q16769            | QPCT              | Glutaminyl-peptide cyclotransferase                                    | 0.67      | 0.55-0.82    | 0.0318         |
| P05026            | ATP1B1            | Sodium/potassium-transporting ATPase subunit beta-1                    | 0.67      | 0.55-0.83    | 0.0500         |
| A0A087X0K0        | COL15A1           | Collagen alpha-1(XV) chain                                             | 0.67      | 0.55-0.82    | 0.0301         |
| P35858            | IGFALS            | Insulin-like growth factor-binding protein complex acid labile subunit | 0.66      | 0.54-0.82    | 0.0288         |
| P22732            | SLC2A5            | Solute carrier family 2, facilitated glucose transporter member 5      | 0.65      | 0.53-0.81    | 0.0226         |
| K4DIA0            | ICOSLG            | ICOS ligand                                                            | 0.65      | 0.53-0.79    | 0.0087         |
| P00749            | PLAU              | Urokinase-type plasminogen activator                                   | 0.64      | 0.51-0.79    | 0.0113         |
| P10809            | HSP60             | 60 kDa heat shock protein, mitochondrial                               | 0.63      | 0.52-0.78    | 0.0035         |
| P19961            | AMY2B             | Alpha-amylase 2B                                                       | 0.63      | 0.51-0.87    | 0.0067         |
| P00352            | ALDH1A1           | Aldehyde dehydrogenase 1A1                                             | 0.63      | 0.52-0.77    | 0.0031         |
| A0A0C4DGN4        | ZG16B             | Zymogen granule protein 16 homolog B                                   | 0.63      | 0.51-0.76    | 0.0013         |
| P01133            | EGF               | Pro-epidermal growth factor                                            | 0.61      | 0.49-0.77    | 0.0062         |
| P15291            | B4GALT1           | Beta-1,4-galactosyltransferase 1                                       | 0.62      | 0.50-0.75    | 0.0005         |

|        |             |                                |      |           |        |
|--------|-------------|--------------------------------|------|-----------|--------|
| Q9UKU9 | ANGPTL<br>2 | Angiopoietin-related protein 2 | 0.61 | 0.50-0.75 | 0.0008 |
| P24855 | DNASE1      | Deoxyribonuclease-1            | 0.60 | 0.49-0.74 | 0.0004 |
| P04746 | AMY2A       | Pancreatic alpha-amylase       | 0.59 | 0.48-0.74 | 0.0010 |

HR = Hazard ratio, CI = confidence interval



**Table S4. Urinary biomarkers associated with DHFA adjusting for the inverse of urine creatinine (1/urine creatinine).** Urinary proteins significantly associated with the outcome when adjusting for total urine proteins include 43 significant proteins, of which three (TCN2, GSTM3, PDCD1LG2) are not represented in our main analyses.

| Uniprot ID | Short name | Full name                                                         | HR   | 95%CI     | P value  |
|------------|------------|-------------------------------------------------------------------|------|-----------|----------|
| P24855     | DNASE1     | Deoxyribonuclease-1                                               | 0.51 | 0.41-0.64 | 4.79E-07 |
| P04746     | AMY2A      | Pancreatic alpha-amylase                                          | 0.54 | 0.43-0.67 | 8.00E-06 |
| P00352     | ALDH1A1    | Aldehyde dehydrogenase 1A1                                        | 0.54 | 0.44-0.67 | 9.01E-06 |
| Q9UKU9     | ANGPTL2    | Angiopoietin-related protein 2                                    | 0.56 | 0.46-69   | 9.77E-06 |
| P01133     | EGF        | Pro-epidermal growth factor                                       | 0.55 | 0.45-0.68 | 1.52E-05 |
| A0A0C4DGN4 | ZG16B      | Zymogen granule protein 16B                                       | 0.57 | 0.46-0.70 | 2.42E-05 |
| P19961     | P19961     | Alpha-amylase 2B                                                  | 0.55 | 0.43-0.68 | 5.35E-05 |
| P00749     | PLAU       | Urokinase-type plasminogen activator                              | 0.57 | 0.46-71   | 7.32E-05 |
| K4DIA0     | K4DIA0     | Inducible T cell costimulator ligand                              | 0.60 | 0.49-0.73 | 1.26E-04 |
| P15291     | B4GALT1    | Beta-1,4-galactosyltransferase 1                                  | 0.58 | 0.47-0.72 | 1.45E-04 |
| P10809     | HSPD1      | 60 kDa heat shock protein, mitochondrial                          | 0.59 | 0.48-0.73 | 1.49E-04 |
| P22732     | SLC2A5     | Solute carrier family 2, facilitated glucose transporter member 5 | 0.61 | 0.50-0.74 | 3.51E-04 |
| A0A087X0K0 | COL15A1    | Collagen type XV alpha 1 chain                                    | 0.61 | 0.50-0.74 | 3.73E-04 |
| Q16769     | QPCT       | Glutaminyl-peptide cyclotransferase                               | 0.58 | 0.47-0.73 | 5.83E-04 |
| X6R868     | X6R868     | X6R868                                                            | 0.61 | 0.50-0.75 | 7.27E-04 |
| P05026     | ATP1B1     | Sodium/potassium-transporting ATPase subunit beta-1               | 0.61 | 0.49-0.75 | 8.11E-04 |
| P33908     | P33908     | Mannosyl-oligosaccharide 1,2-alpha-mannosidase IA                 | 0.60 | 0.48-0.74 | 8.14E-04 |
| A0A087X0S5 | COL6A1     | Collagen type VI alpha 1 chain                                    | 0.61 | 0.49-0.75 | 1.05E-03 |
| Q16651     | PRSS8      | Prostasin                                                         | 0.61 | 0.49-0.75 | 1.29E-03 |

|            |          |                                                                        |      |           |          |
|------------|----------|------------------------------------------------------------------------|------|-----------|----------|
| P00558     | PGK1     | Phosphoglycerate kinase 1                                              | 0.64 | 0.53-0.78 | 2.19E-03 |
| P25705     | ATP5F1A  | ATP synthase subunit alpha, mitochondrial                              | 0.63 | 0.51-0.77 | 3.04E-03 |
| P02743     | APCS     | Serum amyloid P-component                                              | 1.55 | 1.28-1.89 | 4.24E-03 |
| Q9H756     | LRRC19   | Leucine-rich repeat-containing protein 19                              | 0.64 | 0.52-0.79 | 6.24E-03 |
| P01717     | IGLV3-25 | Immunoglobulin lambda variable 3-25                                    | 1.58 | 1.23-1.95 | 6.29E-03 |
| P08582     | MELTF    | Melanotransferrin                                                      | 0.64 | 0.53-0.79 | 6.32E-03 |
| P16870     | CPE      | Carboxypeptidase E                                                     | 0.64 | 0.51-0.78 | 7.14E-03 |
| P22891     | PROZ     | Vitamin K-dependent protein Z                                          | 0.66 | 0.54-0.80 | 9.73E-03 |
| Q9H0W9     | C11orf54 | Ester hydrolase C11orf54                                               | 0.63 | 0.50-0.78 | 1.03E-02 |
| P35858     | IGFALS   | Insulin-like growth factor-binding protein complex acid labile subunit | 0.65 | 0.53-0.80 | 1.49E-02 |
| P02768     | ALB      | Albumin                                                                | 1.50 | 1.23-1.83 | 1.70E-02 |
| P05154     | SERPINA5 | Plasma serine protease inhibitor                                       | 0.65 | 0.53-0.80 | 1.84E-02 |
| O43895     | XPNPEP2  | Xaa-Pro aminopeptidase 2                                               | 0.65 | 0.53-0.80 | 2.02E-02 |
| O75882     | ATRN     | Attractin                                                              | 0.65 | 0.52-0.80 | 2.19E-02 |
| K7EPZ6     | MBD1     | Methyl-CpG binding domain protein 1                                    | 1.53 | 1.24-1.88 | 2.46E-02 |
| Q96RW7     | HMCN1    | Hemicentin-1                                                           | 0.67 | 0.54-0.81 | 2.52E-02 |
| P21266     | GSTM3    | Glutathione S-transferase Mu 3                                         | 0.65 | 0.52-0.80 | 2.54E-02 |
| P00738     | HP       | Haptoglobin                                                            | 1.52 | 1.23-1.87 | 2.62E-02 |
| P55017     | SLC12A3  | Solute carrier family 12 member 3                                      | 0.68 | 0.56-0.82 | 2.90E-02 |
| J3KPF9     | KIF3A    | Kinesin-like protein                                                   | 1.44 | 1.20-1.73 | 3.32E-02 |
| Q9BQ51     | PDCD1LG2 | Programmed cell death 1 ligand 2                                       | 0.66 | 0.54-0.81 | 3.39E-02 |
| F8WE86     | TCN2     | Transcobalamin 2                                                       | 0.67 | 0.54-0.82 | 3.47E-02 |
| P43358     | MAGE4A   | Melanoma-associated antigen 4                                          | 1.45 | 1.20-1.75 | 3.57E-02 |
| A0A075B6N7 | IGHA2    | Immunoglobulin heavy constant alpha 2                                  | 1.46 | 1.12-1.77 | 4.60E-02 |

SE = standard error, CI = confidence interval, eGFR = estimated glomerular filtration rate

**Table S5. Urinary biomarkers associated with DHFA adjusting for randomization arm.**

Urinary proteins significantly associated with the outcome when adjusting for spironolactone (placebo versus spironolactone arm) include 38 proteins, all of which were present in the primary analysis.

| <b>Uniprot ID</b> | <b>Short name</b> | <b>Full name</b>                                                  | <b>HR</b> | <b>95%CI</b> | <b>P value</b> |
|-------------------|-------------------|-------------------------------------------------------------------|-----------|--------------|----------------|
| P24855            | DNASE1            | Deoxyribonuclease-1                                               | 0.57      | 0.46-0.69    | 6.03E-06       |
| P04746            | AMY2A             | Pancreatic alpha-amylase                                          | 0.56      | 0.46-0.69    | 1.13E-05       |
| Q9UKU9            | ANGPTL2           | Angiotensin-converting enzyme 2                                   | 0.58      | 0.48-0.71    | 2.51E-05       |
| P01133            | EGF               | Pro-epidermal growth factor                                       | 0.58      | 0.47-0.71    | 4.25E-05       |
| A0A0C4DGN4        | ZG16B             | Zymogen granule protein 16 homolog B                              | 0.60      | 0.49-0.73    | 8.71E-05       |
| P00352            | ALDH1A1           | Aldehyde dehydrogenase 1A1                                        | 0.59      | 0.48-0.72    | 8.97E-05       |
| P19961            | AMY2B             | Alpha-amylase 2B                                                  | 0.60      | 0.49-0.73    | 0.0001948      |
| P00749            | PLAU              | Urokinase-type plasminogen activator                              | 0.60      | 0.49-0.73    | 0.0002170      |
| K4DIA0            | ICOSLG            | ICOS ligand                                                       | 0.61      | 0.50-0.74    | 0.00022086     |
| P10809            | HSP60             | 60 kDa heat shock protein, mitochondrial                          | 0.60      | 0.49-0.74    | 0.00027407     |
| P15291            | B4GALT1           | Beta-1,4-galactosyltransferase 1                                  | 0.60      | 0.49-0.74    | 0.0002886      |
| P22732            | SLC2A5            | Solute carrier family 2, facilitated glucose transporter member 5 | 0.61      | 0.50-0.75    | 0.0004492      |
| A0A087X0K0        | COL15A1           | Collagen alpha-1(XV) chain                                        | 0.64      | 0.53-0.77    | 0.001404       |
| X6R868            | X6R868            | X6R868                                                            | 0.64      | 0.52-0.77    | 0.001890       |

|            |           |                                                                        |      |           |           |
|------------|-----------|------------------------------------------------------------------------|------|-----------|-----------|
| P05026     | ATP1B1    | Sodium/potassium-transporting ATPase subunit beta-1                    | 0.64 | 0.52-0.78 | 0.002986  |
| Q16651     | Prostasin | Prostasin                                                              | 0.64 | 0.52-0.78 | 0.003200  |
| A0A087X0S5 | COL6A1    | Collagen alpha-1(VI) chain                                             | 0.64 | 0.53-0.78 | 0.003225  |
| Q16769     | QPCT      | Glutaminyl-peptide cyclotransferase                                    | 0.65 | 0.53-0.78 | 0.003453  |
| P00558     | PGKA      | Phosphoglycerate kinase 1                                              | 0.66 | 0.54-0.79 | 0.004354  |
| P25705     | ATP5F1A   | ATP synthase subunit alpha, mitochondrial                              | 0.64 | 0.52-0.78 | 0.004836  |
| P33908     | MAN1A1    | Mannosyl-oligosaccharide 1,2-alpha-mannosidase IA                      | 0.65 | 0.53-0.79 | 0.004878  |
| P02743     | APCS      | Serum amyloid P-component                                              | 1.54 | 1.26-1.87 | 0.0054568 |
| P01717     | IGLV3-25  | Immunoglobulin lamda variable 3-25                                     | 1.58 | 1.28-1.95 | 0.006024  |
| P08582     | MELTF     | Melanotransferrin                                                      | 0.66 | 0.54-0.80 | 0.01121   |
| Q9H756     | LRRC19    | Leucine-rich repeat-containing protein 19                              | 0.66 | 0.55-0.81 | 0.01531   |
| P22891     | PROZ      | Vitamin K-dependent protein Z                                          | 0.67 | 0.55-0.81 | 0.01643   |
| P16870     | CPE       | Carboxypeptidase E                                                     | 0.67 | 0.55-0.82 | 0.02165   |
| P02768     | Albumin   | Albumin                                                                | 1.49 | 1.22-1.81 | 0.02346   |
| P35858     | IGFALS    | Insulin-like growth factor-binding protein complex acid labile subunit | 0.66 | 0.54-0.81 | 0.02386   |
| Q96RW7     | HMCN1     | Hemicentin-1                                                           | 0.67 | 0.55-0.82 | 0.02933   |

|            |             |                                                     |      |           |         |
|------------|-------------|-----------------------------------------------------|------|-----------|---------|
|            |             |                                                     |      |           |         |
| Q9H0W9     | C11orf54    | Ester hydrolase<br>C11orf54                         | 0.67 | 0.55-0.82 | 0.03138 |
| P55017     | SLC12A3     | Solute carrier family<br>12 member 3                | 0.68 | 0.56-0.82 | 0.03205 |
| O43895     | XPNPEP2     | Xaa-Pro<br>aminopeptidase 2                         | 0.67 | 0.55-0.82 | 0.03594 |
| K7EPZ6     | MBD1        | Methyl-CpG-binding<br>domain protein 1              | 1.51 | 1.23-1.87 | 0.03597 |
| P00738     | Haptoglobin | Haptoglobin                                         | 1.50 | 1.22-1.84 | 0.03698 |
| P05154     | SERPINA5    | Plasma serine protease<br>inhibitor                 | 0.67 | 0.55-0.82 | 0.03874 |
| P43358     | MAGEA4      | Melanoma-associated<br>antigen 4                    | 1.46 | 1.20-1.77 | 0.03929 |
| A0A075B6N7 | IGHA2       | Immunoglobulin heavy<br>constant alpha<br>2 (IGHA2) | 1.46 | 1.20-1.77 | 0.04635 |

HR = Hazard ratio, CI = confidence interval
